# Supplementary material for: Disorder in molecular crystals justified with the help of statistical mechanics: a case of two enantiomer solid solutions
Source: Royal Society of Chemistry journal article supplement (doi:10.1039/c9ce00347a), 2019-01-01
Supplement: c9ce00347a1.pdf [file c9ce00347a1.pdf]

## Supporting Information

# Disorder in Molecular Crystals Justified with the Help of Statistical Mechanics: A Case of Two Enantiomer Solid Solutions

Toms Rekis  
Department of Physical Chemistry, University of Latvia  
[toms.rekis@lu.lv](mailto:toms.rekis@lu.lv)

Table S1. Lattice energy (kJ/mol) breakdown of compound **1** canonical ensemble local structures (interaction energy half-sum of each of Z molecules (A, B, C, D) and molecules within an 11 Å sphere around its centroid).

| Struct. | A      | B      | C      | D      | Average       |
|---------|--------|--------|--------|--------|---------------|
| #0      | -151.0 | -151.0 | -151.0 | -151.0 | <b>-151.0</b> |
| #1      | -150.2 | -146.3 | -142.0 | -151.2 | <b>-147.4</b> |
| #5      | -150.5 | -147.6 | -147.6 | -150.5 | <b>-149.0</b> |
| #6      | -141.3 | -147.0 | -141.2 | -147.0 | <b>-144.1</b> |
| #7      | -146.0 | -145.9 | -142.7 | -142.9 | <b>-144.4</b> |
| #11     | -141.6 | -148.3 | -146.7 | -146.2 | <b>-145.7</b> |
| #15     | -146.9 | -146.9 | -146.9 | -146.9 | <b>-146.9</b> |

Table S2. Lattice energy (kJ/mol) breakdown of compound **1** and **2** canonical ensemble local structures (interaction energy half-sum of each of Z molecules (A, B, C, D) and molecules within an 25 Å sphere around its centroid).

| Struct.  | A      | B      | C      | D      | Average       |
|----------|--------|--------|--------|--------|---------------|
| <b>1</b> |        |        |        |        |               |
| #0       | -154.5 | -154.5 | -154.5 | -154.5 | <b>-154.5</b> |
| #1       | -154.3 | -149.8 | -145.8 | -154.9 | <b>-151.2</b> |
| #5       | -154.9 | -151.6 | -151.5 | -155.0 | <b>-153.2</b> |
| <b>2</b> |        |        |        |        |               |
| #0       | -125.7 | -126.4 | -125.7 | -126.4 | <b>-126.0</b> |
| #1       | -125.3 | -122.7 | -125.3 | -122.7 | <b>-124.0</b> |
| #2       | -128.6 | -125.4 | -124.5 | -123.8 | <b>-125.6</b> |
